# Supplementary material for: Zinc delivery system constructed from food-borne nanoparticles derived from Undaria pinnatifida
Source: Royal Society of Chemistry journal article supplement (doi:10.1039/d1fo01852c), 2021-01-01
Supplement: d1fo01852c1.pdf [file d1fo01852c1.pdf]

## Electronic Supplementary Information (ESI)

### **Zinc delivery system constructed by food-borne nanoparticles derived from *Undaria pinnatifida***

Fengzhi Qiao,<sup>a,b,c</sup> Xiaoting Yu,<sup>a,b,c</sup> Shanshan Tie,<sup>a,b,c</sup> Yannan Chen,<sup>a,b,c</sup> Shuai Hou,<sup>\*a,b,c</sup> and  
Mingqian Tan,<sup>\*a,b,c</sup>

<sup>a</sup> *Academy of Food Interdisciplinary Science, Food Science and Technology, Dalian Polytechnic University, Qinggongyuan I, Ganjingzi District, Dalian 116034, Liaoning, China*

<sup>b</sup> *National Engineering Research Center of Seafood, Dalian Polytechnic University, Dalian 116034, Liaoning, China*

<sup>c</sup> *Collaborative Innovation Center of Seafood Deep Processing, Dalian Polytechnic University Dalian, 116034, China*

\*To whom correspondence should be addressed.

Shuai Hou, E-mail: houshuai009@126.com; ORCID: 0000-0001-5274-5264.

Mingqian Tan, E-mail: mqtan@dlpu.edu.cn; ORCID: 0000-0002-7535-0035.

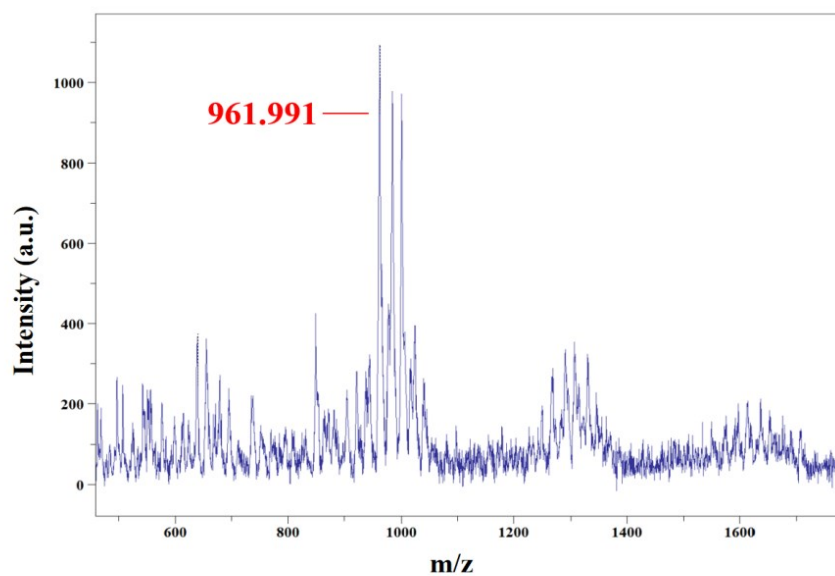

Figure. S1 MALDI-TOF-MS spectrum of UPFNs from *Undaria pinnatifida*.

Table S1 Elemental composition of UPFNs and UPFN-Zn<sup>2+</sup>

|                       | C (%) | N (%) | O (%) | S (%) | Zn (%) |
|-----------------------|-------|-------|-------|-------|--------|
| UPFNs                 | 69.04 | 4.28  | 25.98 | 0.71  | —      |
| UPFN-Zn <sup>2+</sup> | 37.05 | 1.79  | 49.18 | 6.33  | 5.65   |

“—” The element is not present in the sample
